# Supplementary material for: Muslim parents’ knowledge, attitudes, willingness, and barriers toward HPV vaccination for their children: A qualitative study
Source: Research Square preprint supplement (doi:10.21203/rs.3.rs-6338663/v1), 2025-04-01
Supplement: Supplementary file 1 [file 6637924a19a6dba6ca8249e4.docx]

**Highlights**

• This study shows parents' low HPV knowledge and the need for Oman's HPV program

• This study's strengths include the involvement of fathers and data validation

• Gender-segregated focus groups were used for clearer interview discussions

• More studies with teens and stakeholders are warranted
